# Supplementary material for: Alcohol Health Warning Labels: A Rapid Review with Action Recommendations
Source: Int J Environ Res Public Health. 2022 Sep 16;19(18):11676. doi: 10.3390/ijerph191811676 (PMC9517222; doi:10.3390/ijerph191811676)
Supplement: Supplementary file 1 [file ijerph-19-11676-s001.zip]

Archive with 11 entries (11 files):
- S Table S4 Adolescents revised. August 24.pdf
- S Table S7 Pregnancy. revised. Aug. 24. docx.pdf
- S. Table S1 Design. revisd. Aug 24.pdf
- S. Table S10 Alcohol industry revised Aug. 24.pdf
- S. Table S11 Alcohol policy. revised Aug. 24. docx.pdf
- S. Table S2  Messages Content revised.. Aug. 24.pdf
- S. Table S3 Perception and Awareness. revised. Aug. 24. docx.pdf
- S. Table S5 College students. revised Aug 24. docx.pdf
- S. Table S6 Adults and General Population. revised..Aug. 24.pdf
- S. Table S8 Cancer Aug. 24. docx.pdf
- S. table S9 Public Opinion. revised August 24.pdf
